# Supplementary material for: Expanding the Boundaries of RNA Sequencing as a Diagnostic Tool for Rare Mendelian Disease
Source: PubMed Central journal article supplement — Am J Hum Genet. 2019 Feb 28;104(3):466–83. doi: 10.1016/j.ajhg.2019.01.012 (PMC6407525; doi:10.1016/j.ajhg.2019.01.012), 2019-02-28
Supplement: mmc1.pdf [file mmc1.pdf]

**Supplemental Data**

**Expanding the Boundaries of RNA Sequencing as  
a Diagnostic Tool for Rare Mendelian Disease**

**Hernan D. Gonorazky, Sergey Naumenko, Arun K. Ramani, Viswateja Nelakuditi, Pouria Mashouri, Peiqui Wang, Dennis Kao, Krish Ohri, Senthuri Viththiyapaskaran, Mark A. Tarnopolsky, Katherine D. Mathews, Steven A. Moore, Andres N. Osorio, David Villanova, Dwi U. Kemaladewi, Ronald D. Cohn, Michael Brudno, and James J. Dowling**

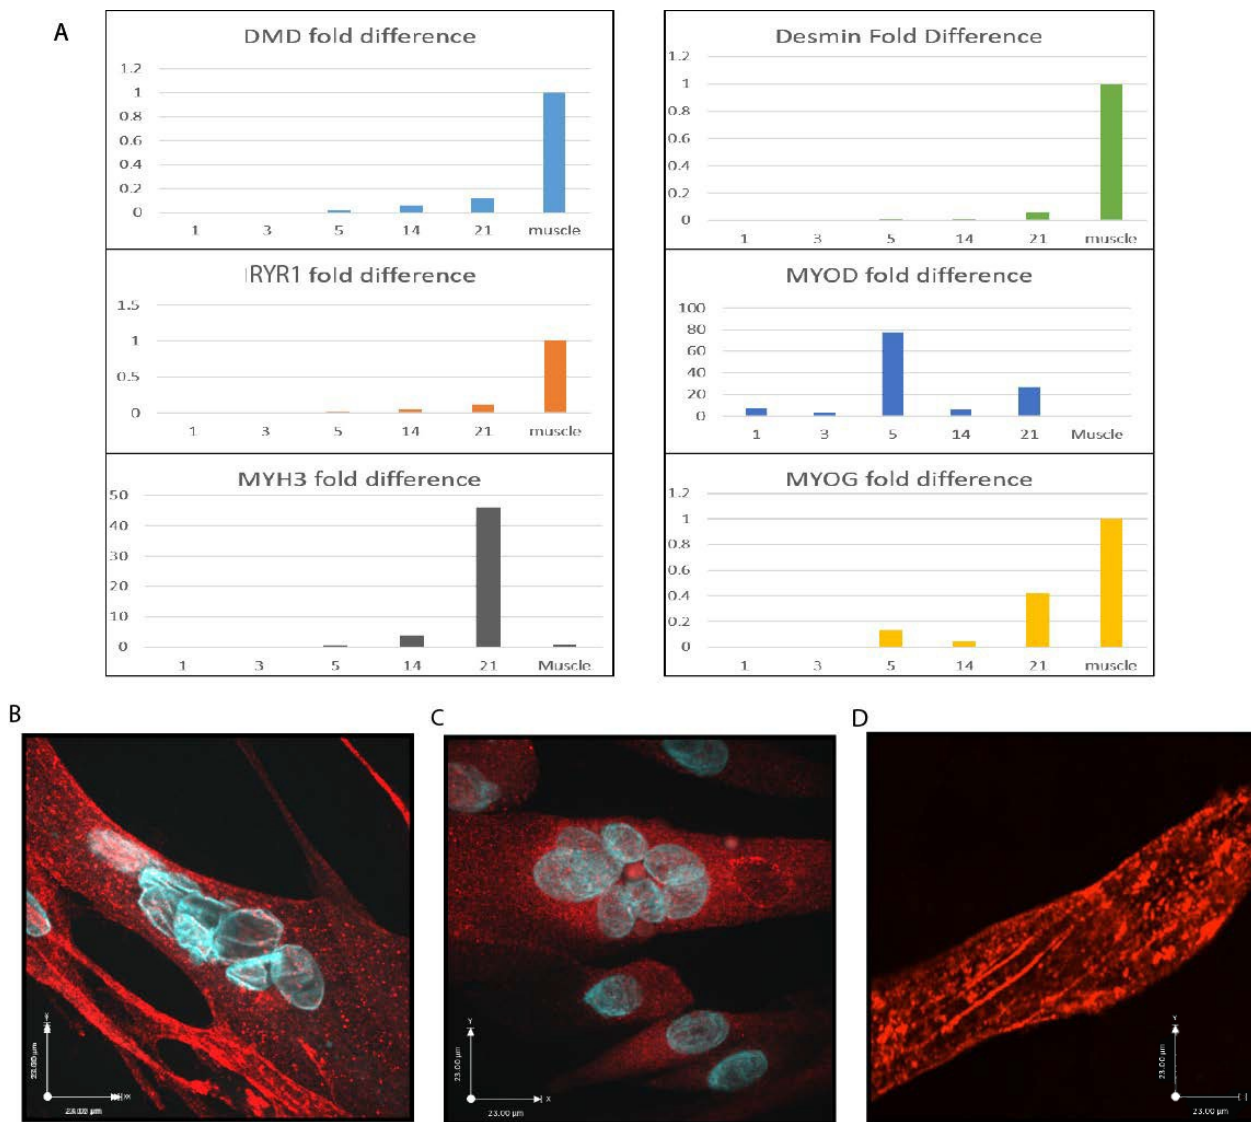

**Supplemental Figure 1. A.** We carried out qRT-PCR to quantify expression for 6 genes at 5 different time points (days 1, 3, 5, 14 and 21) after direct trans-differentiation into myotubes and compared this to their expression in muscles. *MYOD1* showed maximum expression on day 5 after infection while *MYOG*, a myogenic transcription factor known to be stimulated by *MYOD1*, was expressed at increasing levels beginning day 5. The expression of *MYH3* steadily increased until the end of the experiment (day 21) and reached a level of 50x higher than skeletal muscle. The expression of terminal differentiation markers such as *DMD*, *DES*, and *RYR1* steadily increased through the end of the time course (day 21), with easily detectable expression starting at day 5. For each of these genes the final expression on day 21 was still lower than their expression in skeletal muscle samples. **B-D.** Morphological assessment revealed that most of transdifferentiated myotubes had characteristics of early myotubes. The majority were mononucleated, with less than 2% having multiple nuclei. Consistent with the qPCR data, t-myotubes stained positive for Dystrophin (**B**), ryanodine receptor type 1 (RyR1) (**C**), and skeletal muscle alpha-actinin (**D**).

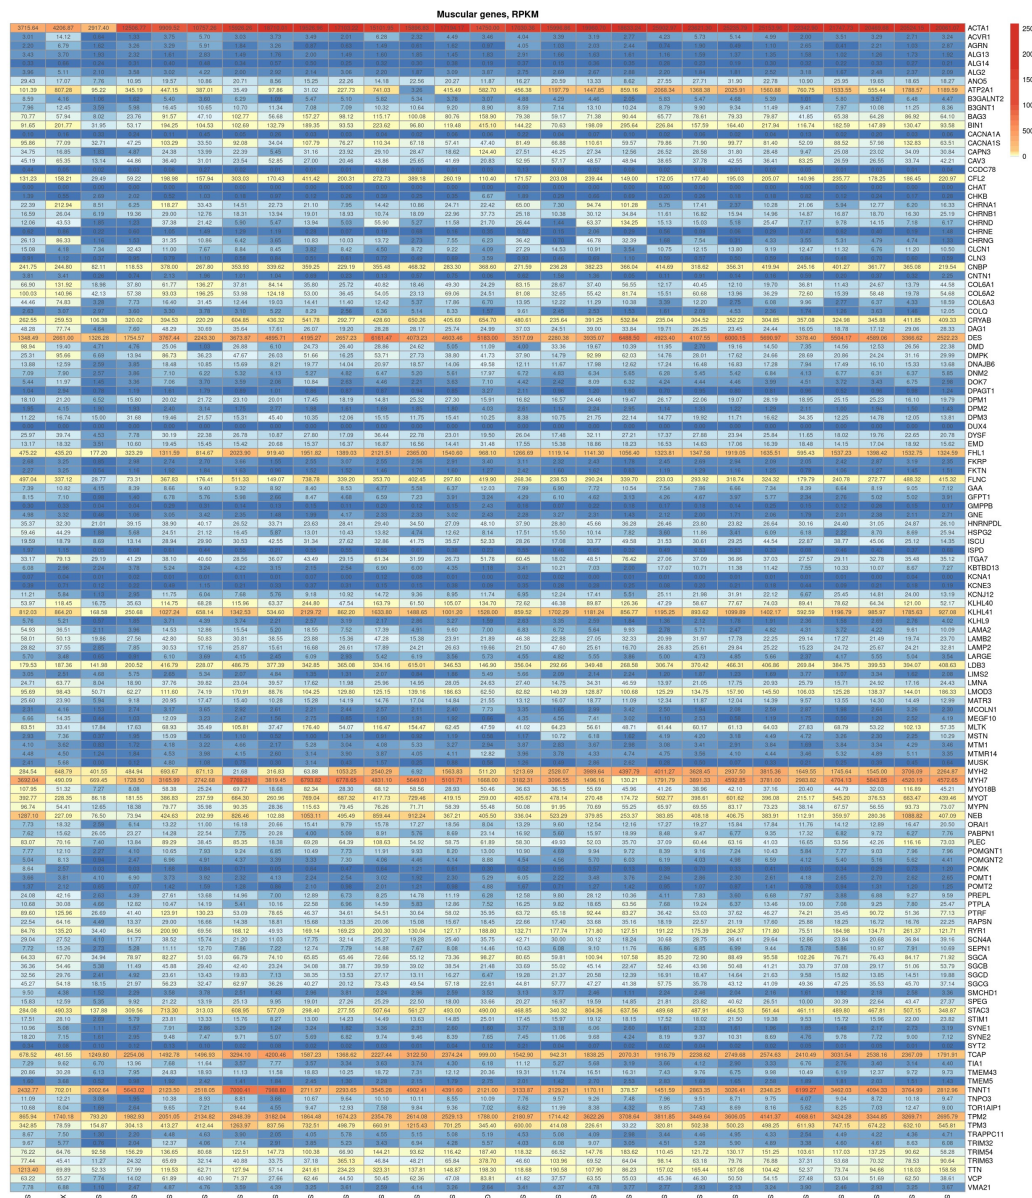

**Supplemental Figure 2.** For each of the 132 genes in our set of neuromuscular disease gene panel, we report the expression values (RPKM) across all of the skeletal muscle samples in our cohort as well as GTEx data. Each box in the table represents the expression of a gene (rows) in a muscle sample (columns) and colours associated with each value representing the expression level, with blue representing low expression, red representing high expression and yellow representing intermediate expression levels.



## A. Muscle

### A1 (<10x)

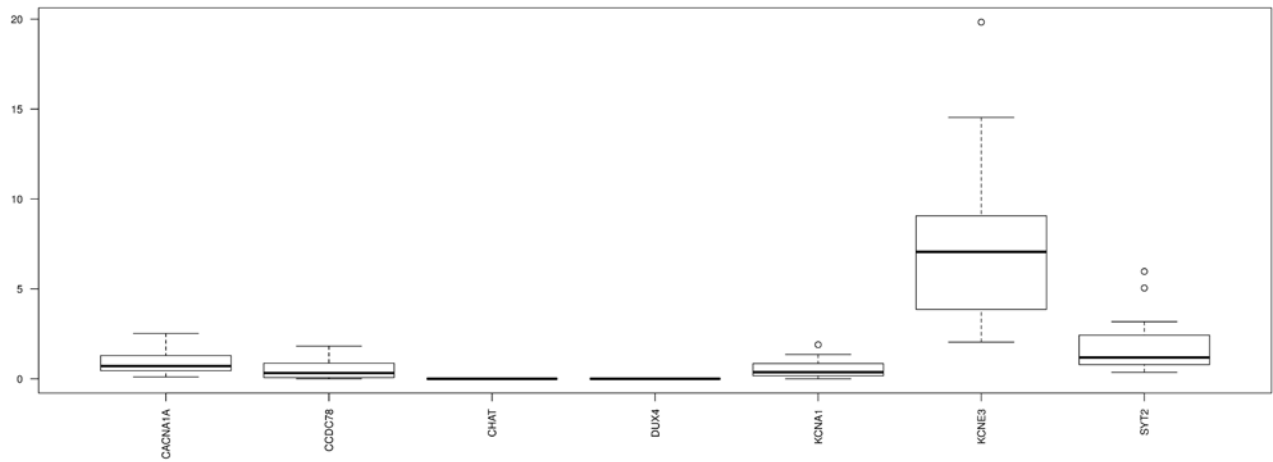

### A2 (10x-100x)

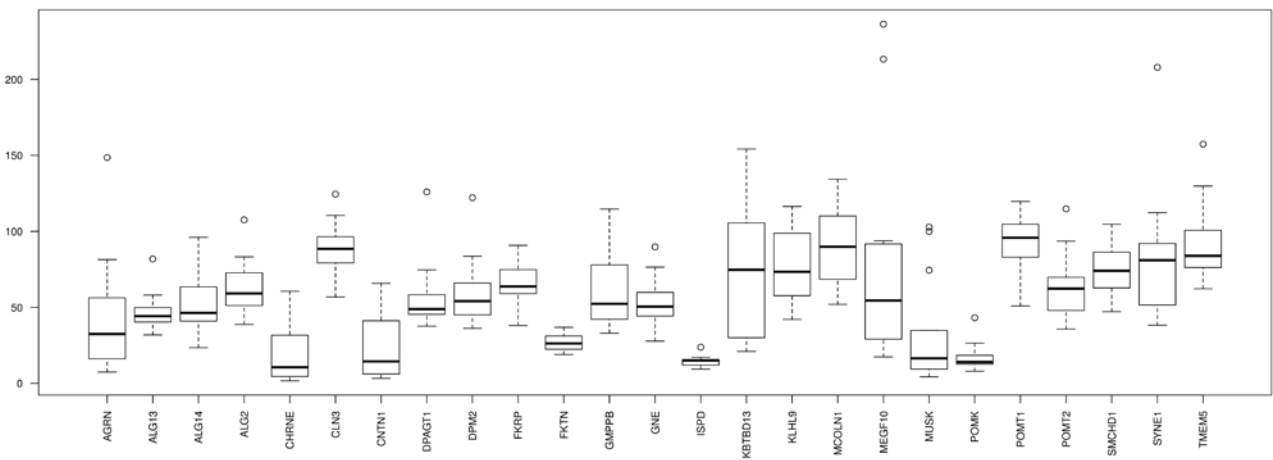

### A3 (100x-1,000x)

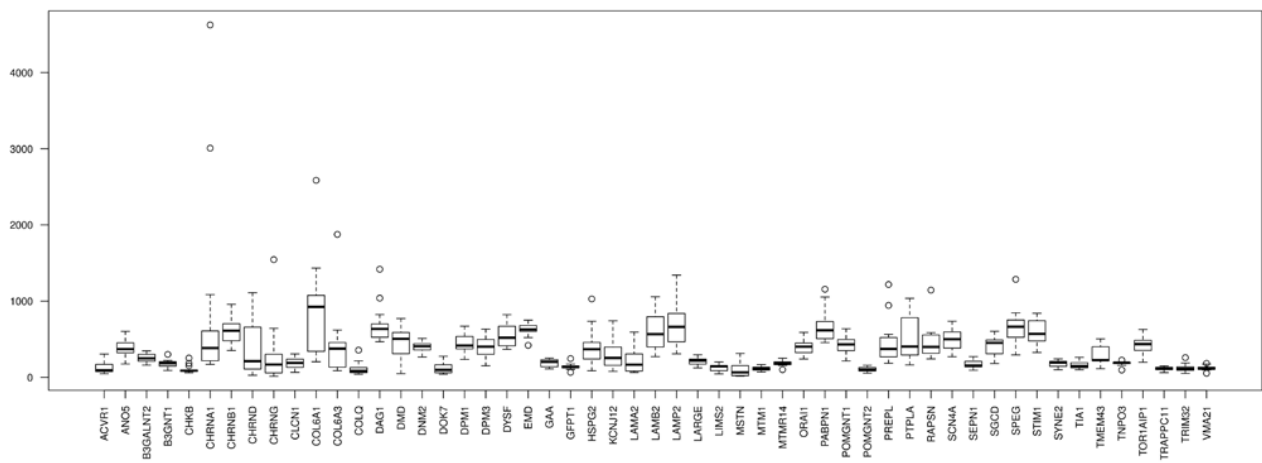

### A4 (1,000x-10,000x)

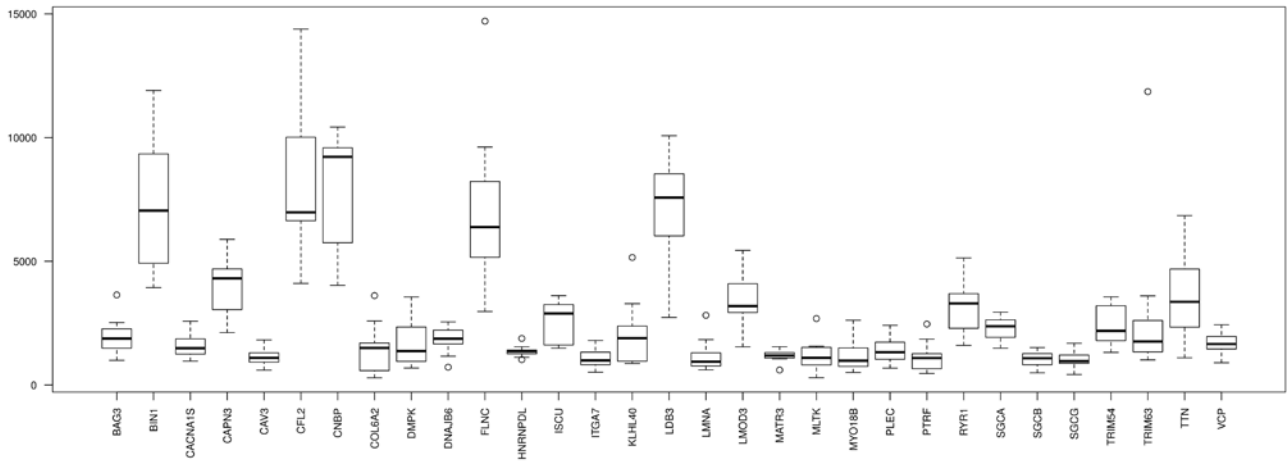

### A5 (>10,000x)

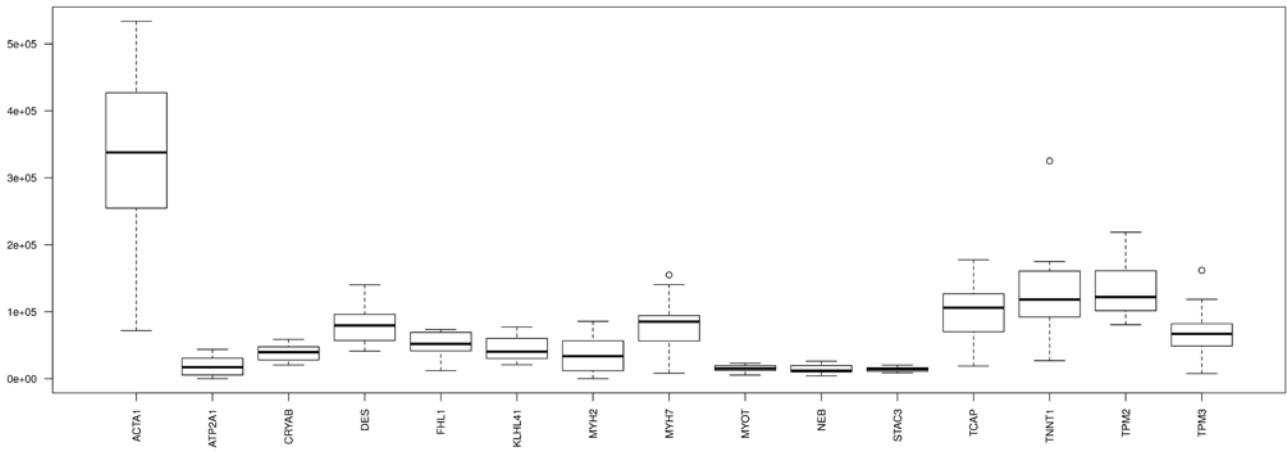

### B. Myotubes

#### B1 (<10x)

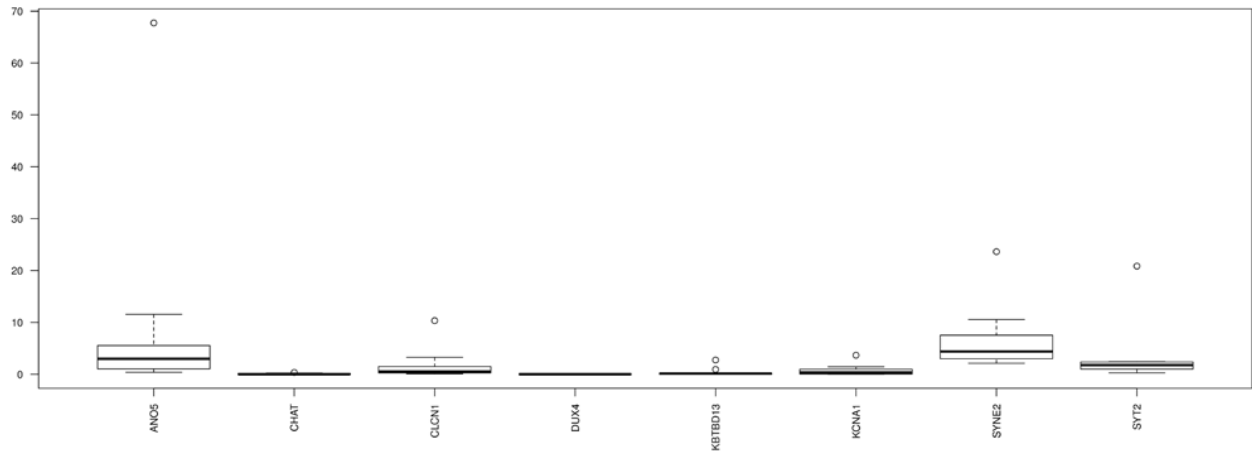

## B2 (10x-100x)

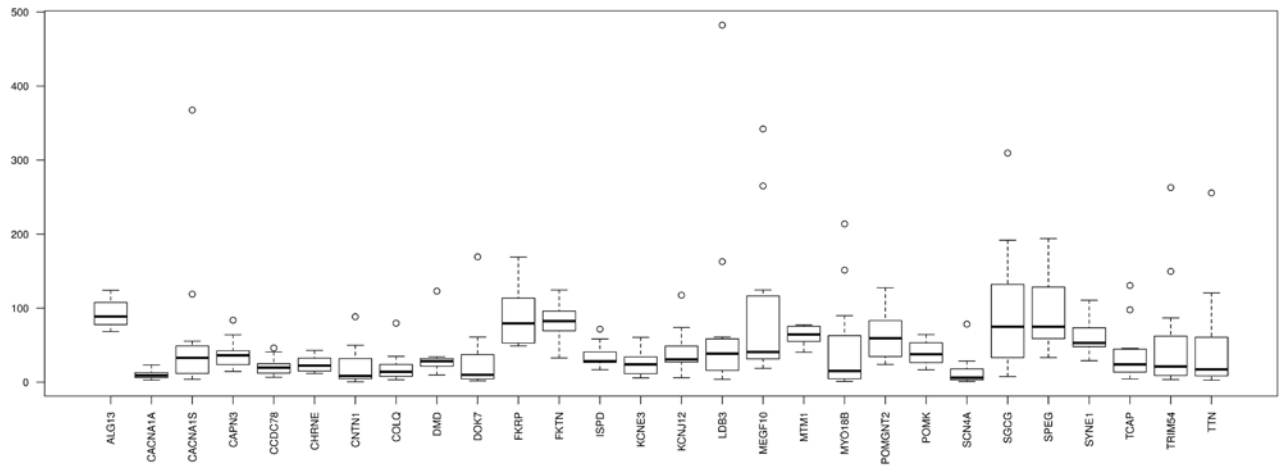

## B3 (100x-1,000x)

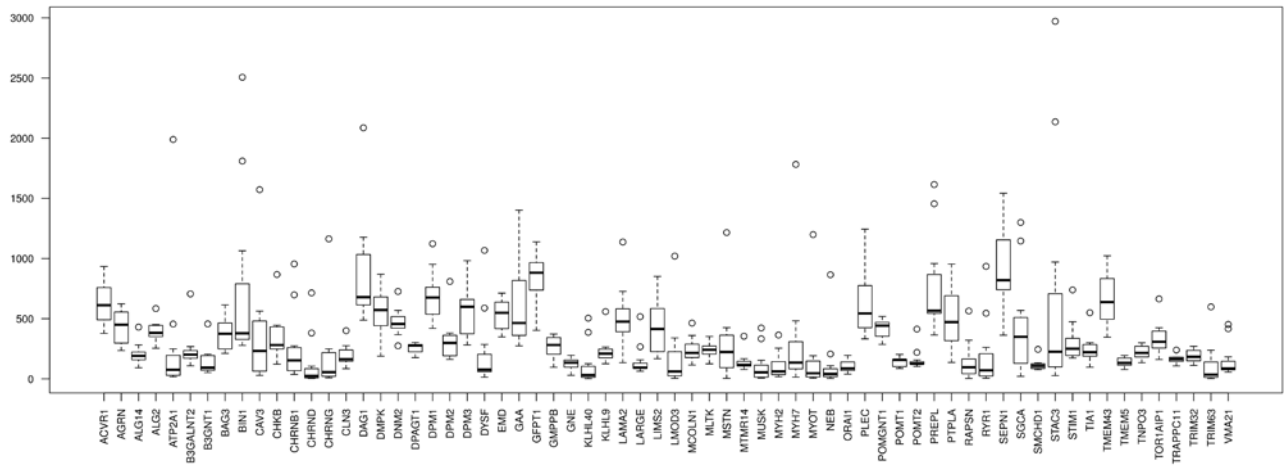

## B4 (1,000x-10,000x)

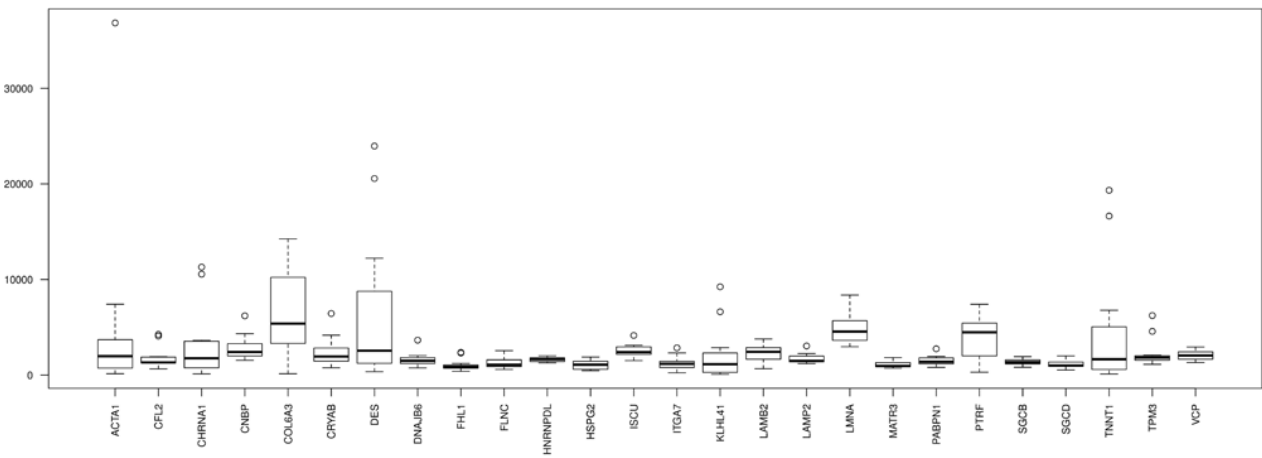

**B5 (>10,000x)**

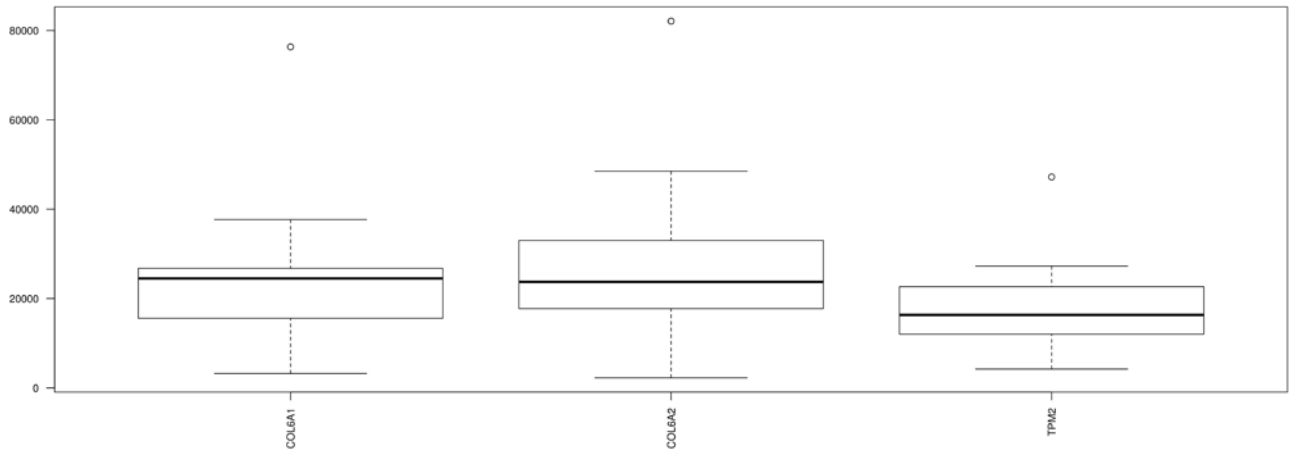

**C. Fibroblasts**

**C1 (<10x)**

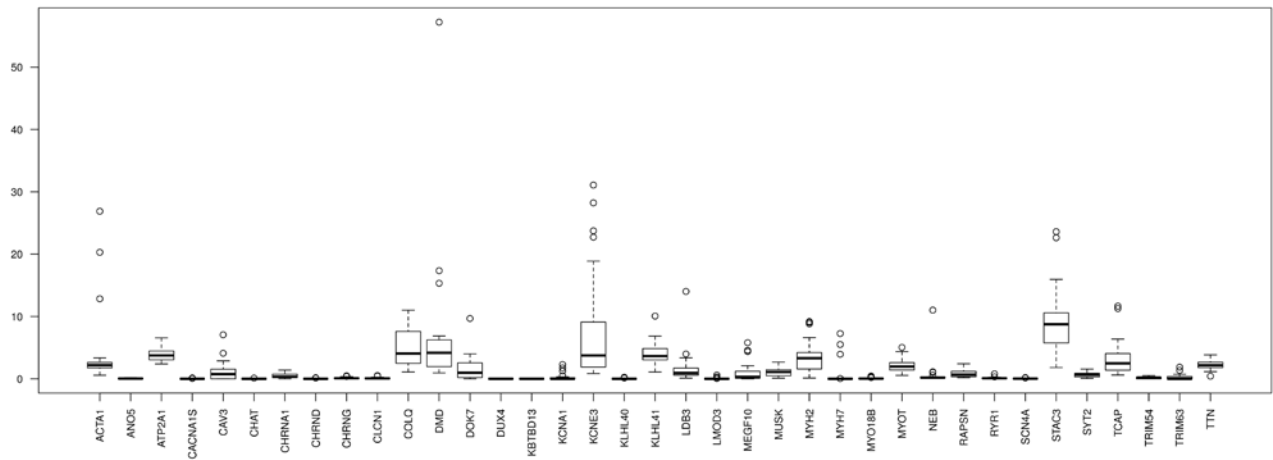

**C2 (10x-100x)**

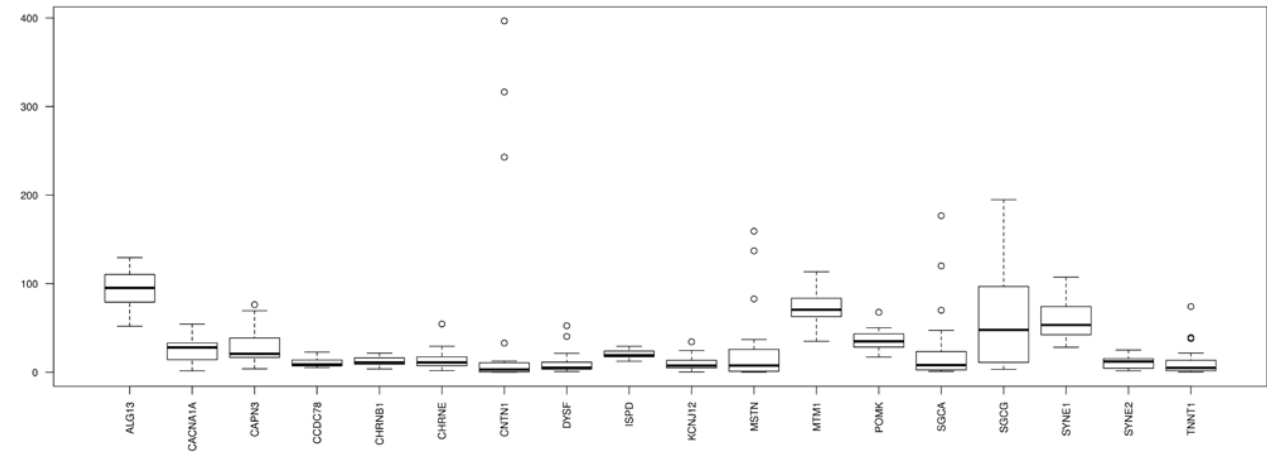



### C3 (100x-1,000x)

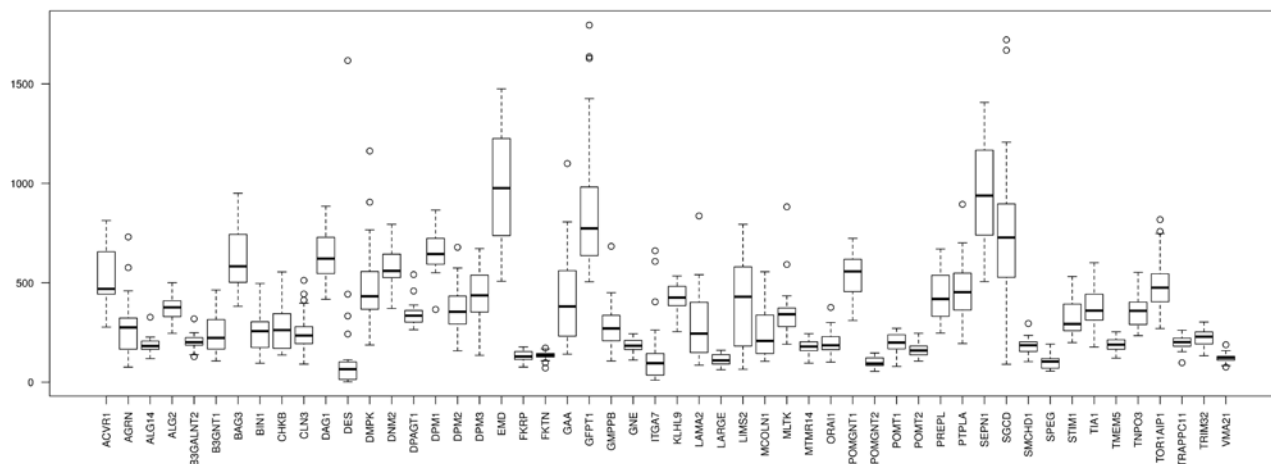

### C4 (1,000x-10,000x)

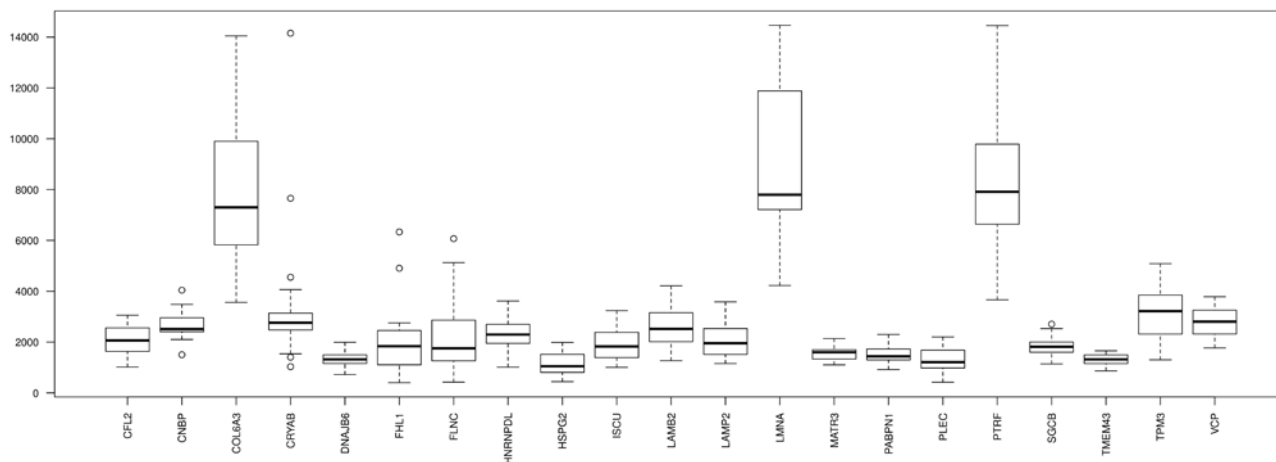

### C5 (>10,000x)

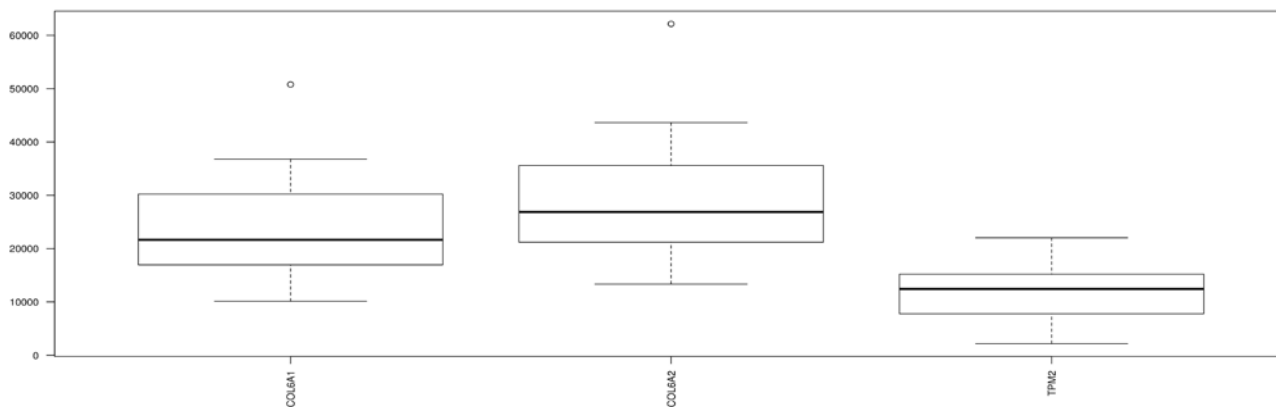

**Supplemental figure 4.** Each of the 132 genes in our neuromuscular gene panel were placed into 5 bins according to their mean coverage across the samples in each tissue (A) Muscle, (B) Myotubes, and (C) Fibroblasts. The 5 bins represent (1) coverage <10X, (2) coverage between 10x-100x, (3) coverage between 100x-1,000x, (4) coverage between 1,000x- 10,000x, and (5) coverage >10,000x.
